# Supplementary material for: The Effect of Trichoderma harzianum Hypovirus 1 (ThHV1) and Its Defective RNA ThHV1-S on the Antifungal Activity and Metabolome of Trichoderma koningiopsis T-51
Source: MDPI journal article supplement (doi:10.3390/jof9020175), 2023-01-28
Supplement: s1 [file s1]

**Table S1. MeCA related gene in transcriptome sequencing and their primers for qRT-PCR**

| Primer Name |          | sequence (5' - 3')   | PCR product size (bp) | RNA-seq gene ID    | log2FC   | KEGG blast                                                                                  |
|-------------|----------|----------------------|-----------------------|--------------------|----------|---------------------------------------------------------------------------------------------|
| E1          | Forwards | CACCGTCTTCGTCGAATGGA | 168                   | Cluster-1420.27977 | 4.163989 | K00505 tyrosinase [EC:1.14.18.1]   (RefSeq) Di-copper centre-containing (A)                 |
|             | Reverse  | GCACAGCTGATAGGCACTGA |                       |                    |          |                                                                                             |
| E2          | Forwards | TTGTTCTCGATTGGCTGCCT | 122                   | Cluster-2800.0     | 3.278433 | K18386 FAD dependent monooxygenase [EC:1.14.13.-]   (RefSeq) FAD binding domain protein (A) |
|             | Reverse  | ACTCGCCGAGGCTGAATATG |                       |                    |          |                                                                                             |
| E3          | Forwards | AAAAGCCGGCAGCTTGATTG | 169                   | Cluster-1420.24841 | 2.518436 | K00505 tyrosinase [EC:1.14.18.1]   (GenBank) tyrosinase 2 (A)                               |
|             | Reverse  | GGTTTGACCAGAGCGAGTGA |                       |                    |          |                                                                                             |
| E4          | Forwards | GGTCCTGAAAATGGCCTGGA | 168                   | Cluster-1420.10766 | 1.594481 | K01904 4-coumarate--CoA ligase [EC:6.2.1.12]   (RefSeq) 4-coumarate:coenzyme A ligase (A)   |
|             | Reverse  | GGTTGTGATCAAACGCTCCG |                       |                    |          |                                                                                             |
| Tk-tef1     | Forwards | TACAAGGGCTGGGAGAAGGA | 196                   | -                  | -        | -                                                                                           |
|             | Reverse  | TACCGGGCTTGAGGATACCA |                       |                    |          |                                                                                             |

**Table S2. Comparison of DNA sequencing of T-51 and 51-13**

| <b>T-51 (reference genome)</b>    | <b>51-13 (Resequencing)</b> |                     |                     |                     |
|-----------------------------------|-----------------------------|---------------------|---------------------|---------------------|
| <b>Total sequence length (nt)</b> | <b>Total_reads</b>          | <b>Mapped_reads</b> | <b>Mapping_rate</b> | <b>Avg.Depth(X)</b> |
| 38274022                          | 13289446                    | 13098381            | 98.56%              | 37.01               |

**Table S3. SNP and indel analysis of 51-13**

| <b>SNP</b>          |               | <b>Indel</b>           |               |
|---------------------|---------------|------------------------|---------------|
| <b>Type</b>         | <b>Number</b> | <b>Type</b>            | <b>Number</b> |
| Exonic              | 20            | exonic                 | 4             |
| Synonymous          | 7             | frameshift_deletion    | 1             |
| Nonsynonymous       | 13            | frameshift_insertion   | 2             |
| Intronic            | 7             | nonframeshift_deletion | 1             |
| Intergenic          | 214           | intronic               | 5             |
| Upstream            | 11            | intergenic             | 33            |
| Downstream          | 11            | upstream               | 13            |
| upstream;downstream | 1             | downstream             | 22            |
|                     |               | upstream;downstream    | 4             |
| <b>Total</b>        | <b>264</b>    | <b>Total</b>           | <b>81</b>     |
